# Supplementary material for: An atoms-in-molecules model of bond energy distributions in polyatomic moleculesElectronic supplementary information (ESI) available: MP2 energies, topological analyses and atoms-in-molecules properties of CHN compounds. See http://www.rsc.org/suppdata/cp/b3/b303476n/
Source: Royal Society of Chemistry journal article supplement (doi:10.1039/b303476n), 2003-01-01
Supplement: b303476n.pdf [file b303476n.pdf]

## Electronic Supplementary Information

### An Atoms-In-Molecules Description Of Bond Energy

### Distributions In Polyatomic Molecules

Siân T. Howard

Department of Chemistry, Cardiff University, Cardiff CF10 3TB, Wales U.K.

#### MP2/6-311G(d,p) // MP2/6-311G(d,p) Energies, Topological Analyses And Atoms-In-Molecules Properties Of CHN compounds (atomic units)

Carbon atom ground state energy: -37.745020  
Nitrogen atom ground state energy: -54.475050  
Hydrogen atom ground state energy: -0.499810

##### C 1N 0H 4 Methane

Molecular Kinetic Energy = 40.32985  
Molecular Total Energy = -40.37923  
Virial = 2.00122  
Carbon basin kinetic energies: 37.8722  
Carbon basin populations: 6.0169  
Carbon basin dipole magnitudes: 0.0000  
Hydrogen basin kinetic energies: 0.6148 0.6148 0.6148 0.6148  
Hydrogen basin populations: 0.9965 0.9965 0.9965 0.9965  
Hydrogen basin dipole magnitudes: 0.1527 0.1527 0.1527 0.1527

##### C 2N 0H 6 Ethane

Molecular Kinetic Energy = 79.48498  
Molecular Total Energy = -79.57089  
Virial = 2.00108  
Carbon basin kinetic energies: 37.8693 37.8693  
Carbon basin populations: 5.9730 5.9730  
Carbon basin dipole magnitudes: 0.0506 0.0506  
Hydrogen basin kinetic energies: 0.6250 0.6250 0.6250 0.6250 0.6250 0.6250  
Hydrogen basin populations: 1.0099 1.0099 1.0099 1.0099 1.0099 1.0099  
Hydrogen basin dipole magnitudes: 0.1572 0.1572 0.1572 0.1572 0.1572 0.1572  
C-C bond CP densities: 0.2398  
C-C bond laplacians: -0.558

##### C 2N 0H 4 Ethene

Molecular Kinetic Energy = 78.28425  
Molecular Total Energy = -78.34429  
Virial = 2.00077  
Carbon basin kinetic energies: 37.9197 37.9197  
Carbon basin populations: 6.0440 6.0440  
Carbon basin dipole magnitudes: 0.0732 0.0732  
Hydrogen basin kinetic energies: 0.6118 0.6118 0.6118 0.6118  
Hydrogen basin populations: 0.9792 0.9792 0.9792 0.9792  
Hydrogen basin dipole magnitudes: 0.1436 0.1436 0.1436 0.1436  
C-C bond CP densities: 0.3354  
C-C bond laplacians: -0.979

C 2N 0H 2 Ethyne

Molecular Kinetic Energy = 77.09111  
Molecular Total Energy = -77.11124  
Virial = 2.00026  
Carbon basin kinetic energies: 37.9942 37.9942  
Carbon basin populations: 6.1519 6.1519  
Carbon basin dipole magnitudes: 0.1622 0.1622  
Hydrogen basin kinetic energies: 0.5522 0.5522  
Hydrogen basin populations: 0.8496 0.8496  
Hydrogen basin dipole magnitudes: 0.1215 0.1215  
C-C bond CP densities: 0.3888  
C-C bond laplacians: -1.081

C 3N 0H 8 Propane

Molecular Kinetic Energy = 118.64342  
Molecular Total Energy = -118.76605  
Virial = 2.00103  
Carbon basin kinetic energies: 37.8700 37.8866 37.8866  
Carbon basin populations: 5.9392 5.9860 5.9860  
Carbon basin dipole magnitudes: 0.0527 0.0456 0.0456  
Hydrogen basin kinetic energies: 0.6334 0.6334 0.6224 0.6237 0.6237 0.6224  
0.6237 0.6237  
Hydrogen basin populations: 1.0195 1.0195 1.0076 1.0112 1.0112 1.0076  
1.0112 1.0112  
Hydrogen basin dipole magnitudes: 0.1609 0.1609 0.1571 0.1602 0.1602 0.1571  
0.1602 0.1602  
C-C bond CP densities: 0.2417 0.2417  
C-C bond laplacians: -0.562 -0.562

C 3N 0H 6 Propene

Molecular Kinetic Energy = 117.44714  
Molecular Total Energy = -117.54365  
Virial = 2.00082  
Carbon basin kinetic energies: 37.9418 37.9282 37.8889  
Carbon basin populations: 6.0236 6.0556 5.9873  
Carbon basin dipole magnitudes: 0.0564 0.0902 0.0773  
Hydrogen basin kinetic energies: 0.6186 0.6158 0.6158 0.6177 0.6117 0.6128  
Hydrogen basin populations: 0.9915 0.9928 0.9928 0.9956 0.9812 0.9868  
Hydrogen basin dipole magnitudes: 0.1484 0.1545 0.1545 0.1556 0.1454 0.1480  
C-C bond CP densities: 0.3349 0.2535  
C-C bond laplacians: -0.970 -0.627

C 3N 0H 4 Propyne

Molecular Kinetic Energy = 116.25788  
Molecular Total Energy = -116.31410  
Virial = 2.00048  
Carbon basin kinetic energies: 37.8453 38.0743 37.9731  
Carbon basin populations: 5.9321 6.1827 6.1451  
Carbon basin dipole magnitudes: 0.2119 0.0098 0.2239  
Hydrogen basin kinetic energies: 0.6044 0.6044 0.6044 0.5552  
Hydrogen basin populations: 0.9623 0.9623 0.9623 0.8588  
Hydrogen basin dipole magnitudes: 0.1470 0.1470 0.1470 0.1250  
C-C bond CP densities: 0.2614 0.3851  
C-C bond laplacians: -0.677 -1.046

C 3N 0H 4 Allene

Molecular Kinetic Energy = 116.24707  
Molecular Total Energy = -116.30512  
Virial = 2.00050  
Carbon basin kinetic energies: 37.8388 38.2025 37.8388  
Carbon basin populations: 5.9448 6.3446 5.9448  
Carbon basin dipole magnitudes: 0.3259 0.0000 0.3259  
Hydrogen basin kinetic energies: 0.5926 0.5926 0.5926 0.5926  
Hydrogen basin populations: 0.9429 0.9429 0.9429 0.9429  
Hydrogen basin dipole magnitudes: 0.1412 0.1412 0.1412 0.1412  
C-C bond CP densities: 0.3393 0.3393  
C-C bond laplacians: -0.996 -0.996

C 4N 0H10 n-Butane

Molecular Kinetic Energy = 157.80525  
Molecular Total Energy = -157.96114  
Virial = 2.00099  
Carbon basin kinetic energies: 37.8854 37.8866 37.8866 37.8854  
Carbon basin populations: 5.9869 5.9487 5.9487 5.9869  
Carbon basin dipole magnitudes: 0.0483 0.0486 0.0486 0.0483  
Hydrogen basin kinetic energies: 0.6218 0.6234 0.6234 0.6328 0.6328 0.6328  
0.6328 0.6218 0.6234 0.6234  
Hydrogen basin populations: 1.0066 1.0104 1.0104 1.0213 1.0213 1.0213  
1.0213 1.0066 1.0104 1.0104  
Hydrogen basin dipole magnitudes: 0.1574 0.1602 0.1602 0.1635 0.1635 0.1635  
0.1635 0.1574 0.1602 0.1602  
C-C bond CP densities: 0.2414 0.2436 0.2414  
C-C bond laplacians: -0.561 -0.567 -0.561

C 4N 0H10 iso-Butane

Molecular Kinetic Energy = 157.805180000000  
Molecular Total Energy = -157.964180000000  
Virial = 2.00100757148783  
Carbon basin kinetic energies: 37.8709 37.9014 37.9014 37.9014  
Carbon basin populations: 5.9159 5.9951 5.9951 5.9951  
Carbon basin dipole magnitudes: 0.0464 0.0436 0.0436 0.0436  
Hydrogen basin kinetic energies: 0.6394 0.6222 0.6222 0.6220 0.6222 0.6222  
0.6220 0.6222 0.6222 0.6220  
Hydrogen basin populations: 1.0252 1.0088 1.0088 1.0113 1.0088 1.0088  
1.0113 1.0088 1.0088 1.0113  
Hydrogen basin dipole magnitudes: 0.1645 0.1593 0.1593 0.1637 0.1593 0.1593  
0.1637 0.1593 0.1593 0.1637  
C-C bond CP densities: 0.2426 0.2426 0.2426  
C-C bond laplacians: -0.563 -0.563 -0.563

C 4N 0H 8 iso-Butene

Molecular Kinetic Energy = 156.61427  
Molecular Total Energy = -156.74434  
Virial = 2.00083  
Carbon basin kinetic energies: 37.9344 37.9603 37.8994 37.8994  
Carbon basin populations: 6.0618 6.0058 5.9962 5.9962  
Carbon basin dipole magnitudes: 0.1047 0.0542 0.0691 0.0691  
Hydrogen basin kinetic energies: 0.6139 0.6139 0.6173 0.6162 0.6162 0.6173  
0.6162 0.6162  
Hydrogen basin populations: 0.9885 0.9885 0.9944 0.9962 0.9962 0.9944  
0.9962 0.9962  
Hydrogen basin dipole magnitudes: 0.1490 0.1490 0.1552 0.1576 0.1576 0.1552  
0.1576 0.1576  
C-C bond CP densities: 0.3335 0.2525 0.2525  
C-C bond laplacians: -0.955 -0.617 -0.617

C 4N 0H 8 But-2-ene

Molecular Kinetic Energy = 156.60819  
Molecular Total Energy = -156.74271  
Virial = 2.00086  
Carbon basin kinetic energies: 37.8847 37.9502 37.9502 37.8847  
Carbon basin populations: 5.9851 6.0321 6.0321 5.9851  
Carbon basin dipole magnitudes: 0.0751 0.0538 0.0538 0.0751  
Hydrogen basin kinetic energies: 0.6199 0.6199 0.6167 0.6167 0.6183 0.6167  
0.6167 0.6183  
Hydrogen basin populations: 0.9988 0.9988 0.9957 0.9957 0.9976 0.9957  
0.9957 0.9976  
Hydrogen basin dipole magnitudes: 0.1523 0.1523 0.1558 0.1558 0.1564 0.1558  
0.1558 0.1564  
C-C bond CP densities: 0.2527 0.3343 0.2527  
C-C bond laplacians: -0.621 -0.959 -0.621

C 4N 0H 6 1,3-Butadiene

Molecular Kinetic Energy = 155.41289  
Molecular Total Energy = -155.52248  
Virial = 2.00071  
Carbon basin kinetic energies: 37.9264 37.9522 37.9522 37.9264  
Carbon basin populations: 6.0548 6.0162 6.0162 6.0548  
Carbon basin dipole magnitudes: 0.0944 0.0683 0.0683 0.0944  
Hydrogen basin kinetic energies: 0.6082 0.6094 0.6131 0.6131 0.6082 0.6094  
Hydrogen basin populations: 0.9731 0.9791 0.9814 0.9814 0.9731 0.9791  
Hydrogen basin dipole magnitudes: 0.1443 0.1470 0.1474 0.1474 0.1443 0.1470  
C-C bond CP densities: 0.3319 0.2743 0.3319  
C-C bond laplacians: -0.961 -0.728 -0.961

C 6N 0H10 Hexa-2,4-diene

Molecular Kinetic Energy = 233.73869  
Molecular Total Energy = -233.92193  
Virial = 2.00078  
Carbon basin kinetic energies: 37.9482 37.9601 37.9601 37.9482 37.8846  
37.8846  
Carbon basin populations: 6.0323 6.0243 6.0243 6.0323 5.9854  
5.9854  
Carbon basin dipole magnitudes: 0.0561 0.0631 0.0631 0.0561 0.0816  
0.0816  
Hydrogen basin kinetic energies: 0.6173 0.6155 0.6155 0.6173 0.6174 0.6153  
0.6153 0.6153 0.6174 0.6153  
Hydrogen basin populations: 0.9936 0.9912 0.9912 0.9936 0.9957 0.9924  
0.9924 0.9924 0.9957 0.9924  
C-C bond CP densities: 0.3308 0.2745 0.3308 0.2535 0.2535  
C-C bond laplacians: -0.948 -0.724 -0.948 -0.623 -0.623

C 4N 0H 2 1,3-Butadiyne

Molecular Kinetic Energy = 153.02951  
Molecular Total Energy = -153.05998  
Virial = 2.00020  
Carbon basin kinetic energies: 37.9472 38.0259 38.0259 37.9472  
Carbon basin populations: 6.0870 6.0831 6.0831 6.0870  
Carbon basin dipole magnitudes: 0.2665 0.1274 0.1274 0.2665  
Hydrogen basin kinetic energies: 0.5434 0.5434  
Hydrogen basin populations: 0.8327 0.8327  
Hydrogen basin dipole magnitudes: 0.1220 0.1220  
C-C bond CP densities: 0.3824 0.3018 0.3824  
C-C bond laplacians: -1.050 -0.863 -1.050

C 4N 0H 6 But-2-yne

Molecular Kinetic Energy = 155.42005  
Molecular Total Energy = -155.51588  
Virial = 2.00062  
Carbon basin kinetic energies: 37.8398 38.0513 38.0513 37.8398  
Carbon basin populations: 5.9303 6.1671 6.1671 5.9303  
Carbon basin dipole magnitudes: 0.2005 0.0610 0.0610 0.2005  
Hydrogen basin kinetic energies: 0.6071 0.6071 0.6071 0.6071 0.6071 0.6071  
Hydrogen basin populations: 0.9689 0.9689 0.9689 0.9689 0.9689 0.9689  
Hydrogen basin dipole magnitudes: 0.1492 0.1492 0.1492 0.1492 0.1492 0.1492  
C-C bond CP densities: 0.2601 0.3816 0.2601  
C-C bond laplacians: -0.666 -1.013 -0.666

C 4N 0H 4 Butatriene

Molecular Kinetic Energy = 154.20548  
Molecular Total Energy = -154.26951  
Virial = 2.00042  
Carbon basin kinetic energies: 37.8340 38.0865 38.0865 37.8340  
Carbon basin populations: 5.9418 6.1813 6.1813 5.9418  
Carbon basin dipole magnitudes: 0.2984 0.1799 0.1799 0.2984  
Hydrogen basin kinetic energies: 0.5922 0.5922 0.5922 0.5922  
Hydrogen basin populations: 0.9403 0.9403 0.9403 0.9403  
Hydrogen basin dipole magnitudes: 0.1420 0.1420 0.1420 0.1420  
C-C bond CP densities: 0.3316 0.3563 0.3316  
C-C bond laplacians: -0.964 -1.028 -0.964

C 5N 0H12 neo-Pentane

Molecular Kinetic Energy = 196.97205  
Molecular Total Energy = -197.16465  
Virial = 2.00098  
Carbon basin kinetic energies: 37.8730 37.9136 37.9136 37.9136 37.9136  
Carbon basin populations: 5.9060 6.0008 6.0008 6.0008 6.0008  
Carbon basin dipole magnitudes: 0.0000 0.0437 0.0437 0.0437 0.0437  
Hydrogen basin kinetic energies: 0.6215 0.6215 0.6215 0.6215 0.6215 0.6215 0.6215 0.6215 0.6215 0.6215 0.6215  
Hydrogen basin populations: 1.0093 1.0093 1.0093 1.0093 1.0093 1.0093 1.0093 1.0093 1.0093 1.0093 1.0093  
Hydrogen basin dipole magnitudes: 0.1621 0.1621 0.1621 0.1621 0.1621 0.1621 0.1621 0.1621 0.1621 0.1621 0.1621  
C-C bond CP densities: 0.2425 0.2425 0.2425 0.2425  
C-C bond laplacians: -0.558 -0.558 -0.558 -0.558

C 5N 0H 4 Pentatetraene

Molecular Kinetic Energy = 192.17524  
Molecular Total Energy = -192.23769  
Virial = 2.00032  
Carbon basin kinetic energies: 37.8274 38.0901 37.9972 38.0901 37.8274  
Carbon basin populations: 5.9363 6.1814 6.0469 6.1814 5.9363  
Carbon basin dipole magnitudes: 0.3439 0.2146 0.0000 0.2146 0.3439  
Hydrogen basin kinetic energies: 0.5870 0.5870 0.5870 0.5870  
Hydrogen basin populations: 0.9316 0.9316 0.9316 0.9316  
Hydrogen basin dipole magnitudes: 0.1412 0.1412 0.1412 0.1412  
C-C bond CP densities: 0.3328 0.3508 0.3508 0.3328  
C-C bond laplacians: -0.968 -1.012 -1.012 -0.968

C 6N 0H 8 1,3,5-Hexatriene

Molecular Kinetic Energy = 232.54445  
Molecular Total Energy = -232.70271  
Virial = 2.00068  
Carbon basin kinetic energies: 37.9248 37.9492 37.9614 37.9614 37.9492  
37.9248  
Carbon basin populations: 6.0552 6.0132 6.0240 6.0240 6.0132  
6.0552  
Carbon basin dipole magnitudes: 0.0980 0.0745 0.0641 0.0641 0.0745  
0.0980  
Hydrogen basin kinetic energies: 0.6078 0.6089 0.6129 0.6115 0.6115 0.6129  
0.6089 0.6078  
Hydrogen basin populations: 0.9724 0.9786 0.9812 0.9824 0.9824 0.9812  
0.9786 0.9724  
Hydrogen basin dipole magnitudes: 0.1446 0.1473 0.1475 0.1502 0.1502 0.1475  
0.1473 0.1446  
C-C bond CP densities: 0.3305 0.2768 0.3275 0.2768 0.3305  
C-C bond laplacians: -0.955 -0.736 -0.940 -0.736 -0.955

C 6N 0H14 n-Hexane

Molecular Kinetic Energy = 236.12576  
Molecular Total Energy = -236.35128  
Virial = 2.00096  
Carbon basin kinetic energies: 37.8846 37.8844 37.9032 37.9032 37.8844  
37.8846  
Carbon basin populations: 5.9867 5.9489 5.9613 5.9613 5.9489  
5.9867  
Carbon basin dipole magnitudes: 0.0488 0.0502 0.0362 0.0362 0.0502  
0.0488  
Hydrogen basin kinetic energies: 0.6218 0.6233 0.6233 0.6323 0.6323 0.6318  
0.6318 0.6318 0.6318 0.6323 0.6323 0.6218  
0.6233 0.6233  
Hydrogen basin populations: 1.0068 1.0102 1.0102 1.0203 1.0203 1.0222  
1.0222 1.0222 1.0222 1.0203 1.0203 1.0068  
1.0102 1.0102  
C-C bond CP densities: 0.2410 0.2431 0.2428 0.2431 0.2410  
C-C bond laplacians: -0.558 -0.564 -0.562 -0.564 -0.558

C 7N 0H 4 HC(CCH)<sub>3</sub> (C3v)

Number of C-C bonds : 6  
Number of C-H bonds : 4  
Number of C-N bonds : 0  
Number of N-H bonds : 0  
Molecular Kinetic Energy = 268.09095  
Molecular Total Energy = -268.17738  
Virial = 2.00032  
Carbon basin kinetic energies: 37.7640 38.0729 37.9600 38.0729 37.9600  
38.0729 37.9600  
Carbon basin populations: 5.7890 6.1474 6.1130 6.1474 6.1130  
6.1474 6.1130  
Carbon basin dipole magnitudes: 0.1815 0.0456 0.2377 0.0456 0.2377  
0.0456 0.2377  
Hydrogen basin kinetic energies: 0.5887 0.5489 0.5489 0.5489  
Hydrogen basin populations: 0.9074 0.8446 0.8446 0.8446  
C-C bond CP densities: 0.2594 0.3838 0.2594 0.3838 0.2594 0.3838  
C-C bond laplacians: -0.658 -1.038 -0.658 -1.038 -0.658 -1.038

C 9N 0H 4 C(CCH)<sub>4</sub> (Td)

Number of C-C bonds : 8

Number of C-H bonds : 4

Number of C-N bonds : 0

Number of N-H bonds : 0

Molecular Kinetic Energy = 343.99768

Molecular Total Energy = -344.10755

Virial = 2.00032

Carbon basin kinetic energies: 37.7067 38.0742 37.9539 38.0742 37.9539  
38.0742 37.9539 38.0742 37.9539

Carbon basin populations: 5.7213 6.1324 6.1007 6.1324 6.1007  
6.1324 6.1007 6.1324 6.1007

Carbon basin dipole magnitudes: 0.0000 0.0685 0.2435 0.0685 0.2435  
0.0685 0.2435 0.0685 0.2435

Hydrogen basin kinetic energies: 0.5469 0.5469 0.5469 0.5469

Hydrogen basin populations: 0.8401 0.8401 0.8401 0.8401

C-C bond CP densities: 0.2585 0.3828 0.2585 0.3828 0.2585 0.3828  
0.2585 0.3828

C-C bond laplacians: -0.650 -1.032 -0.650 -1.032 -0.650 -1.032  
-0.650 -1.032

C10N 0H 4 (HCC)<sub>2</sub>C=C(CCH)<sub>2</sub>

Molecular Kinetic Energy = 382.02283

Molecular Total Energy = -382.12145

Virial = 2.00026

Carbon basin kinetic energies: 37.9633 38.0684 37.8617 37.8617 38.0684  
37.9633 38.0684 37.9633 38.0684 37.9633

Carbon basin populations: 6.1158 6.1284 5.8433 5.8433 6.1284  
6.1158 6.1284 6.1158 6.1284 6.1158

Carbon basin dipole magnitudes: 0.2307 0.0244 0.1051 0.1051 0.0244  
0.2307 0.0244 0.2307 0.0244 0.2307

Hydrogen basin kinetic energies: 0.5457 0.5457 0.5457 0.5457

Hydrogen basin populations: 0.8382 0.8382 0.8382 0.8382

Hydrogen basin dipole magnitudes: 0.1228 0.1228 0.1228 0.1228

C-C bond CP densities: 0.3827 0.2825 0.3100 0.2825 0.3827 0.2825  
0.3827 0.2825 0.3827

C-C bond laplacians: -1.051 -0.767 -0.842 -0.767 -1.051 -0.767  
-1.051 -0.767 -1.051

C 0N 1H 3 Ammonia

Molecular Kinetic Energy = 56.43094

Molecular Total Energy = -56.40879

Virial = 1.99961

Nitrogen basin kinetic energies: 54.9475

Nitrogen basin populations: 8.0052

Nitrogen basin dipole magnitudes: 0.2039

Hydrogen basin kinetic energies: 0.4948 0.4948 0.4948

Hydrogen basin populations: 0.6654 0.6654 0.6654

Hydrogen basin dipole magnitudes: 0.1830 0.1830 0.1830

C 1N 1H 5 Methylamine

Molecular Kinetic Energy = 95.56367  
Molecular Total Energy = -95.58746  
Virial = 2.00025  
Carbon basin kinetic energies: 37.6869  
Carbon basin populations: 5.6344  
Carbon basin dipole magnitudes: 0.4244  
Nitrogen basin kinetic energies: 54.9832  
Nitrogen basin populations: 7.9922  
Nitrogen basin dipole magnitudes: 0.2519  
Hydrogen basin kinetic energies: 0.5022 0.5022 0.6268 0.6268 0.6386  
Hydrogen basin populations: 0.6723 0.6723 1.0006 1.0006 1.0321  
Hydrogen basin dipole magnitudes: 0.1855 0.1855 0.1507 0.1507 0.1574  
C-N bond CP densities: 0.2621  
C-N bond laplacians: -0.709

C 2N 1H 7 Dimethylamine

Molecular Kinetic Energy = 134.70549  
Molecular Total Energy = -134.77258  
Virial = 2.00050  
Carbon basin kinetic energies: 37.7037 37.7037  
Carbon basin populations: 5.6415 5.6415  
Carbon basin dipole magnitudes: 0.4367 0.4367  
Nitrogen basin kinetic energies: 55.0356  
Nitrogen basin populations: 7.9953  
Nitrogen basin dipole magnitudes: 0.2666  
Hydrogen basin kinetic energies: 0.5070 0.6251 0.6251 0.6325 0.6325 0.6236  
0.6236  
Hydrogen basin populations: 0.6744 1.0003 1.0003 1.0310 1.0310 0.9975  
0.9975  
Hydrogen basin dipole magnitudes: 0.1858 0.1540 0.1540 0.1690 0.1690 0.1506  
0.1506  
C-N bond CP densities: 0.2677 0.2677  
C-N bond laplacians: -0.731 -0.731

C 3N 1H 9 Trimethylamine

Molecular Kinetic Energy = 173.85898  
Molecular Total Energy = -173.96267  
Virial = 2.00060  
Carbon basin kinetic energies: 37.7204 37.7204 37.7204  
Carbon basin populations: 5.6483 5.6483 5.6483  
Carbon basin dipole magnitudes: 0.4511 0.4511 0.4511  
Nitrogen basin kinetic energies: 55.0915  
Nitrogen basin populations: 8.0072  
Nitrogen basin dipole magnitudes: 0.2732  
Hydrogen basin kinetic energies: 0.6252 0.6234 0.6234 0.6252 0.6234 0.6234 0  
0.6252 0.6234 0.6234  
Hydrogen basin populations: 1.0275 0.9966 0.9966 1.0275 0.9966 0.9966  
1.0275 0.9966 0.9966  
Hydrogen basin dipole magnitudes: 0.1814 0.1525 0.1525 0.1814 0.1525 0.1525  
0.1814 0.1525 0.1525  
C-N bond CP densities: 0.2706 0.2706 0.2706  
C-N bond laplacians: -0.742 -0.742 -0.742



C 1N 2H 6 Diaminomethane

Molecular Kinetic Energy = 150.80893  
Molecular Total Energy = -150.80969  
Virial = 2.00001  
Carbon basin kinetic energies: 37.4932  
Carbon basin populations: 5.2680  
Carbon basin dipole magnitudes: 0.5252  
Nitrogen basin kinetic energies: 55.0236 55.0236  
Nitrogen basin populations: 8.0143 8.0143  
Nitrogen basin dipole magnitudes: 0.2379 0.2379  
Hydrogen basin kinetic energies: 0.6474 0.6474 0.4922 0.4971 0.4922 0.4971  
Hydrogen basin populations: 1.0307 1.0307 0.6568 0.6674 0.6568 0.6674  
C-N bond CP densities: 0.2710 0.2710  
C-N bond laplacians: -0.764 -0.764

C 1N 3H 7 Triaminomethane

Molecular Kinetic Energy = 206.05201  
Molecular Total Energy = -206.04330  
Virial = 1.99996  
Carbon basin kinetic energies: 37.3166  
Carbon basin populations: 4.9468  
Carbon basin dipole magnitudes: 0.4383  
Nitrogen basin kinetic energies: 55.0527 55.0466 55.0449  
Nitrogen basin populations: 8.0261 8.0298 8.0275  
Nitrogen basin dipole magnitudes: 0.2509 0.2380 0.2416  
Hydrogen basin kinetic energies: 0.6463 0.4883 0.4903 0.4976 0.4883 0.4969  
0.4904  
Hydrogen basin populations: 1.0155 0.6505 0.6590 0.6697 0.6509 0.6712  
0.6612  
C-N bond CP densities: 0.2819 0.2716 0.2720  
C-N bond laplacians: -0.827 -0.763 -0.764

C 4N 1H11 t-Butylamine

Molecular Kinetic Energy = 213.04951  
Molecular Total Energy = -213.18809  
Virial = 2.00065  
Carbon basin kinetic energies: 37.9218 37.7003 37.9218 37.9285  
Carbon basin populations: 5.9982 5.6054 5.9982 6.0105  
Carbon basin dipole magnitudes: 0.0635 0.3857 0.0635 0.0240  
Nitrogen basin kinetic energies: 55.0078  
Nitrogen basin populations: 7.9982  
Nitrogen basin dipole magnitudes: 0.2521  
Hydrogen basin kinetic energies: 0.4992 0.4992 0.6202 0.6228 0.6228 0.6212 0.6137 0.6232 0.6212 0.6137 0.6232  
Hydrogen basin populations: 0.6761 0.6761 1.0072 1.0136 1.0136 1.0075 0.9884 1.0140 1.0075 0.9884 1.0140  
C-C bond CP densities: 0.2467 0.2467 0.2441  
C-C bond laplacians: -0.583 -0.583 -0.566  
C-N bond CP densities: 0.2611  
C-N bond laplacians: -0.693

C 2N 2H 6 1,1-diaminoethene

Molecular Kinetic Energy = 188.77602  
Molecular Total Energy = -188.80506  
Virial = 2.00015  
Carbon basin kinetic energies: 37.5245 37.9060  
Carbon basin populations: 5.2368 6.0726  
Carbon basin dipole magnitudes: 0.7452 0.2368  
Nitrogen basin kinetic energies: 55.1039 55.1039  
Nitrogen basin populations: 8.0933 8.0933  
Nitrogen basin dipole magnitudes: 0.1511 0.1511  
Hydrogen basin kinetic energies: 0.6137 0.6137 0.4778 0.4802 0.4778 0.4802  
Hydrogen basin populations: 0.9930 0.9930 0.6297 0.6329 0.6297 0.6329  
Hydrogen basin dipole magnitudes: 0.1521 0.1521 0.1732 0.1713 0.1732 0.1713  
C-C bond CP densities: 0.3271  
C-C bond laplacians: -0.921  
C-N bond CP densities: 0.2969 0.2969  
C-N bond laplacians: -0.915 -0.915

C 2N 2H 6 1,2-diaminoethene

Molecular Kinetic Energy = 188.76112  
Molecular Total Energy = -188.78891  
Virial = 2.00015  
Carbon basin kinetic energies: 37.7408 37.7408  
Carbon basin populations: 5.6605 5.6605  
Carbon basin dipole magnitudes: 0.5279 0.5279  
Nitrogen basin kinetic energies: 55.0442 55.0442  
Nitrogen basin populations: 8.0489 8.0489  
Nitrogen basin dipole magnitudes: 0.1763 0.1763  
Hydrogen basin kinetic energies: 0.6189 0.6189 0.4896 0.4899 0.4896 0.4899  
Hydrogen basin populations: 0.9917 0.9917 0.6496 0.6531 0.6496 0.6531  
Hydrogen basin dipole magnitudes: 0.1476 0.1476 0.1782 0.1802 0.1782 0.1802  
C-C bond CP densities: 0.3320  
C-C bond laplacians: -0.937  
C-N bond CP densities: 0.2838 0.2838  
C-N bond laplacians: -0.823 -0.823

C 1N 1H 3 HN=CH<sub>2</sub>

Molecular Kinetic Energy = 94.35385  
Molecular Total Energy = -94.37576  
Virial = 2.00023  
Carbon basin kinetic energies: 37.5019  
Carbon basin populations: 5.3098  
Carbon basin dipole magnitudes: 0.7169  
Nitrogen basin kinetic energies: 55.1162  
Nitrogen basin populations: 8.0534  
Nitrogen basin dipole magnitudes: 0.2653  
Hydrogen basin kinetic energies: 0.5013 0.6172 0.6204  
Hydrogen basin populations: 0.6707 0.9761 0.9932  
Hydrogen basin dipole magnitudes: 0.1793 0.1370 0.1448  
C-N bond CP densities: 0.3759  
C-N bond laplacians: -0.869

C 3N 1H 7 HN=CMe<sub>2</sub>

Molecular Kinetic Energy = 172.69194  
Molecular Total Energy = -172.78300  
Virial = 2.00053  
Carbon basin kinetic energies: 37.5393 37.9261 37.9261  
Carbon basin populations: 5.2970 6.0136 6.0229  
Carbon basin dipole magnitudes: 0.6393 0.0893 0.0559  
Nitrogen basin kinetic energies: 55.1345  
Nitrogen basin populations: 8.0851  
Nitrogen basin dipole magnitudes: 0.2493  
Hydrogen basin kinetic energies: 0.5037 0.6042 0.6140 0.6140 0.6166 0.6101  
0.6101  
Hydrogen basin populations: 0.6831 0.9628 0.9925 0.9925 0.9944 0.9827  
0.9827  
Hydrogen basin dipole magnitudes: 0.1886 0.1537 0.1546 0.1546 0.1550 0.1537  
0.1537  
C-C bond CP densities: 0.2560 0.2526  
C-C bond laplacians: -0.639 -0.616  
C-N bond CP densities: 0.3754  
C-N bond laplacians: -0.921

C 2N 1H 5 H<sub>2</sub>C=N-Me

Molecular Kinetic Energy = 133.50152  
Molecular Total Energy = -133.56526  
Virial = 2.00048  
Carbon basin kinetic energies: 37.7279 37.5124  
Carbon basin populations: 5.6652 5.3198  
Carbon basin dipole magnitudes: 0.4419 0.7476  
Nitrogen basin kinetic energies: 55.1827  
Nitrogen basin populations: 8.0832  
Nitrogen basin dipole magnitudes: 0.3424  
Hydrogen basin kinetic energies: 0.6153 0.6255 0.6153 0.6128 0.6153  
Hydrogen basin populations: 0.9789 1.0145 0.9789 0.9696 0.9969  
Hydrogen basin dipole magnitudes: 0.1481 0.1666 0.1481 0.1376 0.1600  
C-N bond CP densities: 0.2684 0.3753  
C-N bond laplacians: -0.741 -0.758

C 2N 1H 3 Aminoethyne

Molecular Kinetic Energy = 132.31579  
Molecular Total Energy = -132.33234  
Virial = 2.00013  
Carbon basin kinetic energies: 37.8624 37.8976  
Carbon basin populations: 6.0035 5.8390  
Carbon basin dipole magnitudes: 0.4418 0.8477  
Nitrogen basin kinetic energies: 55.0658  
Nitrogen basin populations: 8.0849  
Nitrogen basin dipole magnitudes: 0.1099  
Hydrogen basin kinetic energies: 0.5543 0.4695 0.4695  
Hydrogen basin populations: 0.8580 0.6096 0.6096  
Hydrogen basin dipole magnitudes: 0.1271 0.1617 0.1617  
C-C bond CP densities: 0.3781  
C-C bond laplacians: -0.951

Physical Chemistry Chemical Physics  
This Journal is © 2003 The Owner Societies.  
C-N bond CP densities: 0.3134  
C-N bond laplacians: -0.946

C 2N 1H 3 HN=C=CH<sub>2</sub>  
Molecular Kinetic Energy = 132.31822  
Molecular Total Energy = -132.35268  
Virial = 2.00026  
Carbon basin kinetic energies: 37.7941 37.7026  
Carbon basin populations: 5.9231 5.4664  
Carbon basin dipole magnitudes: 0.4900 1.1111  
Nitrogen basin kinetic energies: 55.1959  
Nitrogen basin populations: 8.1564  
Nitrogen basin dipole magnitudes: 0.3351  
Hydrogen basin kinetic energies: 0.5837 0.5837 0.4583  
Hydrogen basin populations: 0.9265 0.9265 0.6011  
Hydrogen basin dipole magnitudes: 0.1407 0.1407 0.1608  
C-C bond CP densities: 0.3271  
C-C bond laplacians: -0.878  
C-N bond CP densities: 0.4060  
C-N bond laplacians: -0.863

C 1N 2H 2 HN=C=NH  
Molecular Kinetic Energy = 148.41494  
Molecular Total Energy = -148.41442  
Virial = 2.00000  
Carbon basin kinetic energies: 37.1379  
Carbon basin populations: 4.4899  
Carbon basin dipole magnitudes: 0.3103  
Nitrogen basin kinetic energies: 55.1956 55.1956  
Nitrogen basin populations: 8.1806 8.1806  
Nitrogen basin dipole magnitudes: 0.2705 0.2705  
Hydrogen basin kinetic energies: 0.4450 0.4450  
Hydrogen basin populations: 0.5762 0.5762  
Hydrogen basin dipole magnitudes: 0.1532 0.1532  
C-N bond CP densities: 0.4057 0.4057  
C-N bond laplacians: -0.993 -0.993

C 2N 2H 2 HN=C=C=NH  
Molecular Kinetic Energy = 186.30921  
Molecular Total Energy = -186.33053  
Virial = 2.00011  
Carbon basin kinetic energies: 37.5970 37.5970  
Carbon basin populations: 5.3679 5.3679  
Carbon basin dipole magnitudes: 0.9726 0.9726  
Nitrogen basin kinetic energies: 55.0900 55.0900  
Nitrogen basin populations: 8.0136 8.0136  
Nitrogen basin dipole magnitudes: 0.2436 0.2436  
Hydrogen basin kinetic energies: 0.4704 0.4704  
Hydrogen basin populations: 0.6209 0.6209  
Hydrogen basin dipole magnitudes: 0.1644 0.1644  
C-C bond CP densities: 0.3277  
C-C bond laplacians: -0.880  
C-N bond CP densities: 0.3846 0.3846  
C-N bond laplacians: -0.825 -0.825

C 2N 2H 4 H<sub>2</sub>C=N-CH=NH

Molecular Kinetic Energy = 187.54343  
Molecular Total Energy = -187.58427  
Virial = 2.00022  
Carbon basin kinetic energies: 37.5143 37.3391  
Carbon basin populations: 5.3217 4.9373  
Carbon basin dipole magnitudes: 0.7526 0.6374  
Nitrogen basin kinetic energies: 55.2380 55.1507  
Nitrogen basin populations: 8.1279 8.0743  
Nitrogen basin dipole magnitudes: 0.2573 0.2550  
Hydrogen basin kinetic energies: 0.6045 0.6081 0.6120 0.4838  
Hydrogen basin populations: 0.9486 0.9761 0.9749 0.6461  
Hydrogen basin dipole magnitudes: 0.1335 0.1532 0.1504 0.1760  
C-N bond CP densities: 0.3724 0.2908 0.3854  
C-N bond laplacians: -0.805 -0.868 -0.965

C 1N 3H 5 Guanidine

Molecular Kinetic Energy = 204.86560  
Molecular Total Energy = -204.85899  
Virial = 1.99997  
Carbon basin kinetic energies: 37.0833  
Carbon basin populations: 4.4875  
Carbon basin dipole magnitudes: 0.0643  
Nitrogen basin kinetic energies: 55.1343 55.1275 55.1333  
Nitrogen basin populations: 8.1372 8.1128 8.1098  
Nitrogen basin dipole magnitudes: 0.2152 0.1249 0.1412  
Hydrogen basin kinetic energies: 0.5013 0.4768 0.4723 0.4767 0.4668  
Hydrogen basin populations: 0.6809 0.6270 0.6180 0.6264 0.6074  
Hydrogen basin dipole magnitudes: 0.1898 0.1697 0.1672 0.1696 0.1636  
C-N bond CP densities: 0.3825 0.2987 0.3048  
C-N bond laplacians: -1.141 -0.918 -0.969

C 3N 2H 6 HN=CH-CH=CH-NH<sub>2</sub>

Molecular Kinetic Energy = 226.73406  
Molecular Total Energy = -226.78640  
Virial = 2.00023  
Carbon basin kinetic energies: 37.5375 37.6630 37.9696  
Carbon basin populations: 5.3189 5.5444 6.0396  
Carbon basin dipole magnitudes: 0.6401 0.7124 0.1542  
Nitrogen basin kinetic energies: 55.1067 55.1945  
Nitrogen basin populations: 8.0777 8.2024  
Nitrogen basin dipole magnitudes: 0.2265 0.1321  
Hydrogen basin kinetic energies: 0.5042 0.6283 0.6031 0.6127 0.4602 0.4622  
Hydrogen basin populations: 0.6794 1.0177 0.9705 0.9718 0.5942 0.5929  
Hydrogen basin dipole magnitudes: 0.1853 0.1572 0.1532 0.1440 0.1586 0.1566  
C-C bond CP densities: 0.2808 0.3245  
C-C bond laplacians: -0.753 -0.925  
C-N bond CP densities: 0.3703 0.3049  
C-N bond laplacians: -0.960 -0.746

C 2N 1H 3 Acetonitrile

Molecular Kinetic Energy = 132.34237  
Molecular Total Energy = -132.40726  
Virial = 2.00049  
Carbon basin kinetic energies: 37.8512 37.5435  
Carbon basin populations: 5.9324 5.1977  
Carbon basin dipole magnitudes: 0.2655 0.8991  
Nitrogen basin kinetic energies: 55.1698  
Nitrogen basin populations: 8.0605  
Nitrogen basin dipole magnitudes: 0.4009  
Hydrogen basin kinetic energies: 0.5942 0.5942 0.5942  
Hydrogen basin populations: 0.9382 0.9382 0.9382  
Hydrogen basin dipole magnitudes: 0.1407 0.1407 0.1407  
C-C bond CP densities: 0.2597  
C-C bond laplacians: -0.681  
C-N bond CP densities: 0.4529  
C-N bond laplacians: -0.263

C 1N 1H 1 HC≡N

Molecular Kinetic Energy = 93.17307  
Molecular Total Energy = -93.20021  
Virial = 2.00029  
Carbon basin kinetic energies: 37.4885  
Carbon basin populations: 5.1860  
Carbon basin dipole magnitudes: 0.9727  
Nitrogen basin kinetic energies: 55.1581  
Nitrogen basin populations: 8.0136  
Nitrogen basin dipole magnitudes: 0.4122  
Hydrogen basin kinetic energies: 0.5294  
Hydrogen basin populations: 0.8025  
C-N bond CP densities: 0.4561  
C-N bond laplacians: -0.247

C 1N 2H 2 N≡C-NH<sub>2</sub>

Molecular Kinetic Energy = 148.40706  
Molecular Total Energy = -148.42567  
Virial = 2.00013  
Carbon basin kinetic energies: 37.2951  
Carbon basin populations: 4.7110  
Carbon basin dipole magnitudes: 0.2232  
Nitrogen basin kinetic energies: 55.1264 55.0756  
Nitrogen basin populations: 8.0365 8.0826  
Nitrogen basin dipole magnitudes: 0.3134 0.0881  
Hydrogen basin kinetic energies: 0.4571 0.4571  
Hydrogen basin populations: 0.5868 0.5868  
Hydrogen basin dipole magnitudes: 0.1525 0.1525  
C-N bond CP densities: 0.4465 0.3203  
C-N bond laplacians: -0.317 -1.000

## Physical Chemistry Chemical Physics

This Journal is © 2003 The Owner Societies.

C 3N 2H 6 N≡C-NMe<sub>2</sub> (Cs)

Molecular Kinetic Energy = 226.70202

Molecular Total Energy = -226.79716

Virial = 2.00042

Carbon basin kinetic energies: 37.3210 37.7043 37.7043

Carbon basin populations: 4.7244 5.6468 5.6468

Carbon basin dipole magnitudes: 0.2007 0.4958 0.4958

Nitrogen basin kinetic energies: 55.1852 55.1145

Nitrogen basin populations: 8.1099 8.0375

Nitrogen basin dipole magnitudes: 0.1542 0.3028

Hydrogen basin kinetic energies: 0.6173 0.6079 0.6158 0.6079 0.6173 0.6158

Hydrogen basin populations: 0.9895 0.9573 0.9758 0.9573 0.9895 0.9758

C-N bond CP densities: 0.3277 0.4429 0.2548 0.2548

C-N bond laplacians: -1.015 -0.348 -0.672 -0.672

C 2N 2H 0 Cyanogen N≡C-C≡N

Molecular Kinetic Energy = 185.15783

Molecular Total Energy = -185.22144

Virial = 2.00034

Carbon basin kinetic energies: 37.5001 37.5001

Carbon basin populations: 5.1106 5.1106

Carbon basin dipole magnitudes: 0.6810 0.6810

Nitrogen basin kinetic energies: 55.0813 55.0813

Nitrogen basin populations: 7.8915 7.8915

Nitrogen basin dipole magnitudes: 0.3494 0.3494

C-C bond CP densities: 0.2972

C-C bond laplacians: -0.865

C-N bond CP densities: 0.4474 0.4474

C-N bond laplacians: -0.301 -0.301

C 4N 3H 1 HC(C≡N)<sub>3</sub> (C<sub>3v</sub>)

Molecular Kinetic Energy = 316.31052

Molecular Total Energy = -316.43182

Virial = 2.00038

Carbon basin kinetic energies: 37.7729 37.5477 37.5477 37.5477

Carbon basin populations: 5.7922 5.1730 5.1730 5.1730

Carbon basin dipole magnitudes: 0.2236 0.7801 0.7801 0.7801

Nitrogen basin kinetic energies: 55.1138 55.1138 55.1138

Nitrogen basin populations: 7.9481 7.9481 7.9481

Nitrogen basin dipole magnitudes: 0.3772 0.3772 0.3772

Hydrogen basin kinetic energies: 0.5632

Hydrogen basin populations: 0.8535

C-C bond CP densities: 0.2589 0.2589 0.2589

C-C bond laplacians: -0.665 -0.665 -0.665

C-N bond CP densities: 0.4486 0.4486 0.4486

C-N bond laplacians: -0.203 -0.203 -0.203

C 5N 4H 0 C(C≡N)<sub>4</sub> (T<sub>d</sub>)

Molecular Kinetic Energy = 408.27621

Molecular Total Energy = -408.43416

Virial = 2.00039

Carbon basin kinetic energies: 37.5546 37.7131 37.5546 37.5546 37.5546

Carbon basin populations: 5.1693 5.7246 5.1693 5.1693 5.1693

Carbon basin dipole magnitudes: 0.7371 0.0000 0.7371 0.7371 0.7371

Nitrogen basin kinetic energies: 55.0894 55.0894 55.0894 55.0894

Nitrogen basin populations: 7.9023 7.9023 7.9023 7.9023

Nitrogen basin dipole magnitudes: 0.3641 0.3641 0.3641 0.3641

C-C bond CP densities: 0.2578 0.2578 0.2578 0.2578

C-C bond laplacians: -0.655 -0.655 -0.655 -0.655

C-N bond CP densities: 0.4458 0.4458 0.4458 0.4458

C-N bond laplacians: -0.184 -0.184 -0.184 -0.184

C 4N 1H 11 Trimethyl ylidy

Physical Chemistry Chemical Physics

This Journal is © 2003 The Owner Societies.

Molecular Kinetic Energy = 212.95636

Molecular Total Energy = -213.05691

Virial = 2.00047

Carbon basin kinetic energies: 37.7354 37.7697 37.7836 37.7697

Carbon basin populations: 6.0805 5.7011 5.7224 5.7011

Carbon basin dipole magnitudes: 1.3063 0.4927 0.4380 0.4927

Nitrogen basin kinetic energies: 55.1265

Nitrogen basin populations: 7.9631

Nitrogen basin dipole magnitudes: 0.0533

Hydrogen basin kinetic energies: 0.6508 0.6508 0.6092 0.5938 0.6217 0.6084

0.6084 0.6192 0.5938 0.6092 0.6217

Hydrogen basin populations: 1.0836 1.0836 0.9613 0.9284 0.9958 0.9603

0.9603 0.9950 0.9284 0.9613 0.9958

C-N bond CP densities: 0.1990 0.2524 0.2505 0.2524

C-N bond laplacians: -0.219 -0.661 -0.637 -0.661
